# Supplementary material for: Straddling SnSe2/SnS2 van der Waals tunneling heterostructures for high performance broadband photodetectors
Source: Royal Society of Chemistry journal article supplement (doi:10.1039/d4tc00443d), 2024-01-01
Supplement: d4tc00443d1.pdf [file d4tc00443d1.pdf]

# **Straddling SnSe<sub>2</sub>/SnS<sub>2</sub> van der Waals tunneling heterostructures for high performance broadband photodetectors**

Xiangna Cong <sup>a</sup>, Muhammad Najeeb Ullah Shah<sup>b</sup> and Wenlong He<sup>a,\*</sup>

<sup>a</sup>*Key Laboratory of Optoelectronic Devices and Systems of Ministry of Education and Guangdong Province, College of Physics & Optoelectronic Engineering, Shenzhen University, Shenzhen 518060, China*

<sup>b</sup>*International Collaborative Laboratory of 2D Materials for Optoelectronics Science and Technology of Ministry of Education, Institute of Microscale Optoelectronics, Shenzhen University, Shenzhen 518060, China*

\*Authors to whom correspondence should be addressed.

Electronic mail: wenlong.he@szu.edu.cn

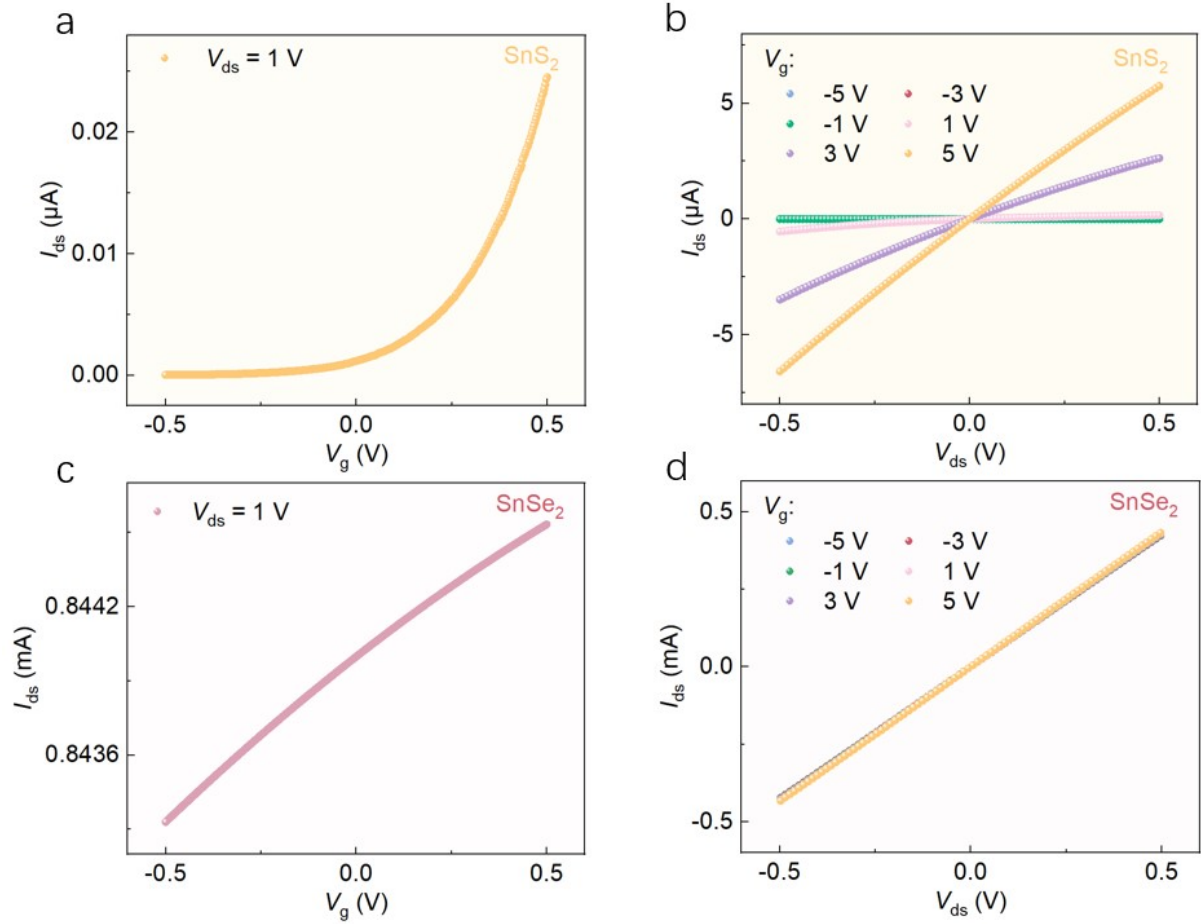

Figure S1 The transport and output curves of SnS<sub>2</sub> (a, b) and SnSe<sub>2</sub> (c, d) for SnSe<sub>2</sub>/SnS<sub>2</sub>/h-BN/graphene heterostructure.

In order to enhance the comprehension of the charge transfer mechanism in the SnS<sub>2</sub> and SnSe<sub>2</sub> heterostructure, electrical measurements are applied on individual SnS<sub>2</sub> and SnSe<sub>2</sub> flakes. The output and transfer curves of SnS<sub>2</sub> and SnSe<sub>2</sub> are shown in Figure S1. It is observed that the gate voltage has a significant impact on the SnS<sub>2</sub> current, implying that the Fermi level of SnS<sub>2</sub> can be readily modulated by the gate voltage. The SnSe<sub>2</sub> transfer curve exhibits n-type conduction characteristics, with a high drain current and minimal modulation within the gate voltage range of -5 to 5 V (Figure S1c), implying that a high electron density and a Fermi level situated close to the SnSe<sub>2</sub> conduction band minimum.

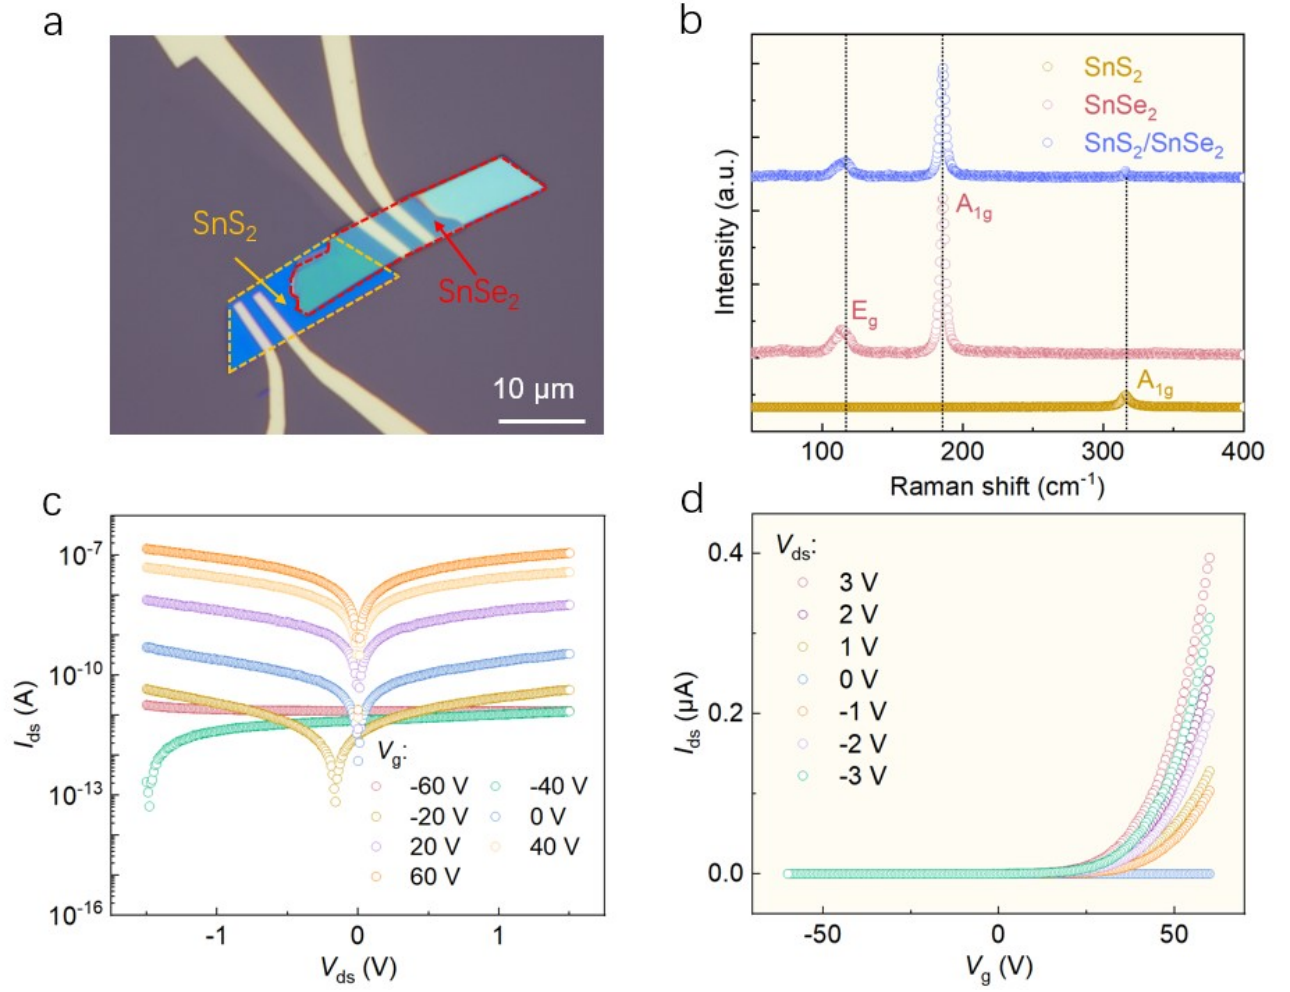

Figure S2 (a) Optical image of the SnSe<sub>2</sub>/SnS<sub>2</sub> heterostructure. (b) Raman spectra of the SnSe<sub>2</sub>/SnS<sub>2</sub> heterostructure. The output (c) and transport (d) curves for SnSe<sub>2</sub>/SnS<sub>2</sub> heterostructure.

Figure S2c-S2d illustrates the electrical characteristics of the SnSe<sub>2</sub>/SnS<sub>2</sub> heterostructure at various voltages. The currents exhibit a decreasing trend as the  $V_g$  decreases, indicating the gate tunability of the SnSe<sub>2</sub>/SnS<sub>2</sub> heterostructure in Figure S2c.

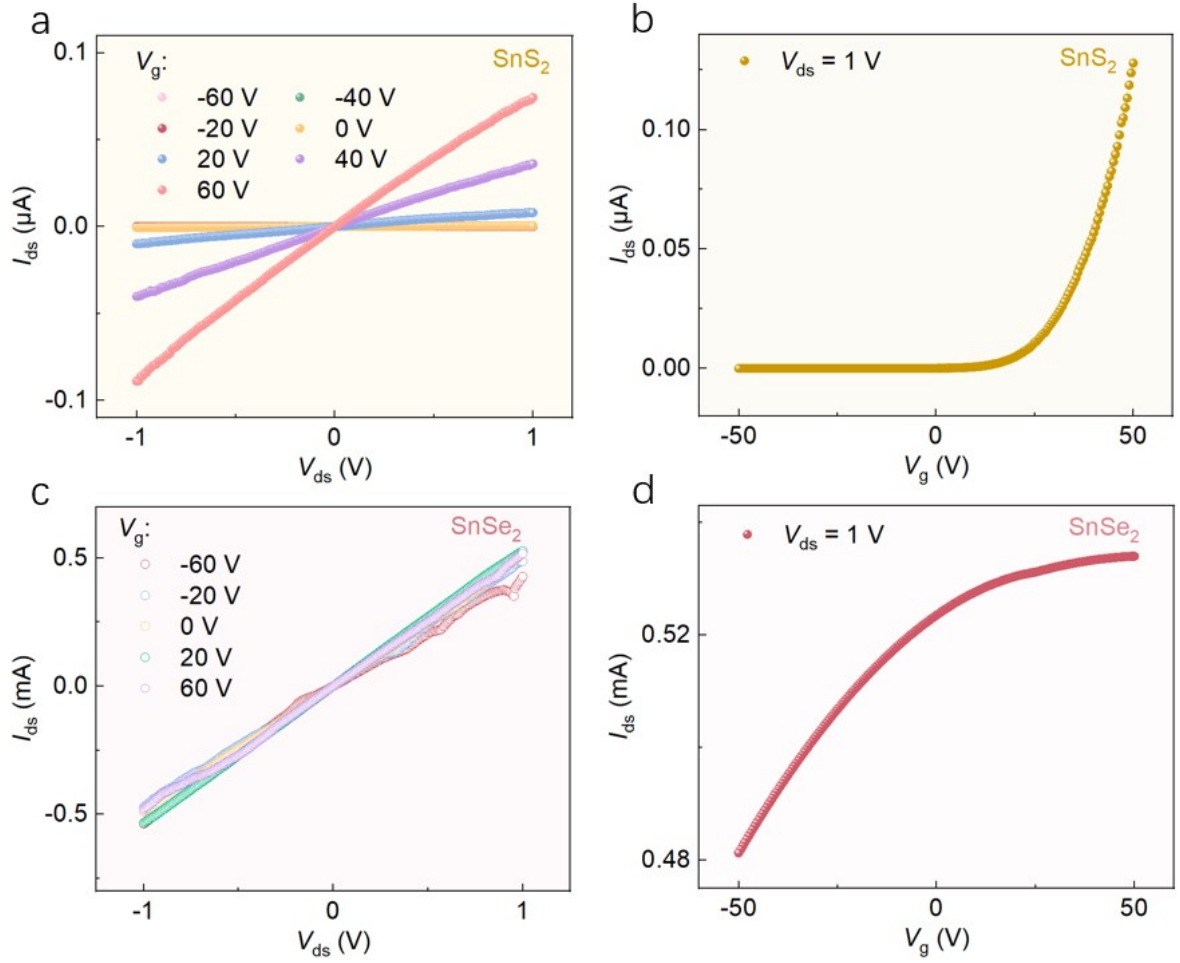

Figure S3 The output and transport curves of SnS<sub>2</sub> (a, b) and SnSe<sub>2</sub> (c, d) for SnSe<sub>2</sub>/SnS<sub>2</sub> heterostructure.

According to Figure S3, the output characteristics of the SnSe<sub>2</sub>/SnS<sub>2</sub> heterostructure are investigated under varying gate voltage. Notably, the current of SnS<sub>2</sub> demonstrates a substantial variation across different gate voltages, indicating that the current is predominantly modulated by the gate voltage. The transfer characteristics of SnSe<sub>2</sub> (SnS<sub>2</sub>) under a gate voltage of 1V demonstrate n-type semiconductor behavior. This indicates that the material exhibits characteristics associated with electron conduction.

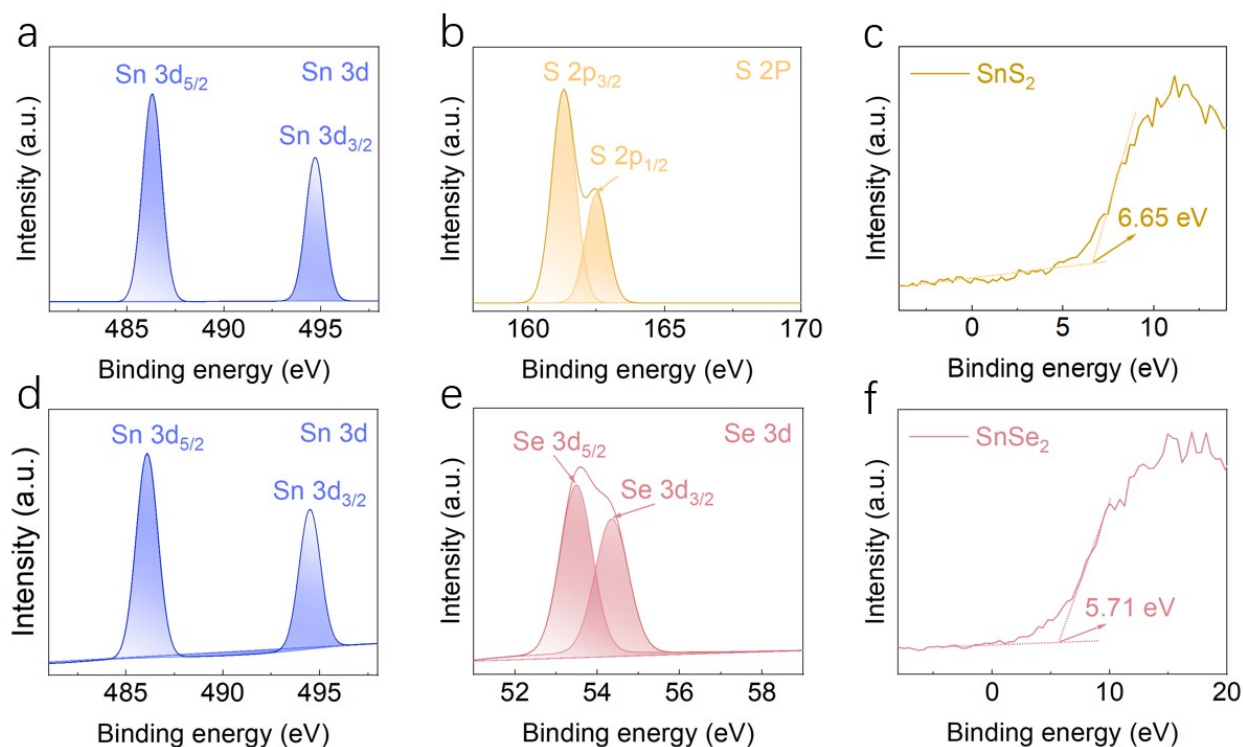

Figure S4 XPS spectra of (a) Sn 3d, (b) S 2p in  $\text{SnS}_2$ , (d) Sn 3d, (e) Se 3d in  $\text{SnSe}_2$ , valence band spectra of (c)  $\text{SnS}_2$ , (f)  $\text{SnSe}_2$ .

The X-ray photoelectron spectroscopy (XPS) spectra of  $\text{SnS}_2$  and  $\text{SnSe}_2$ , are illustrated in Figure S4. In the  $\text{SnS}_2$  heterostructure, the characteristic peaks of the S element are attributed to the  $\text{S 2p}_{3/2}$  (161.31 eV) and  $\text{S 2p}_{1/2}$  (162.52 eV) (Figure S4b), respectively. Additionally, the peaks of Se element at 53.49 eV ( $\text{Se 3d}_{5/2}$ ) and 54.35 eV ( $\text{Se 3d}_{3/2}$ ) correspond to  $\text{SnSe}_2$  (Figure S4e). To validate the band structure, we assess the valence band spectra of both  $\text{SnS}_2$  and  $\text{SnSe}_2$ , the valence band maximum values of 6.65 eV and 5.71 eV for  $\text{SnS}_2$  (Figure S4c) and  $\text{SnSe}_2$  (Figure S4f) are conducted.

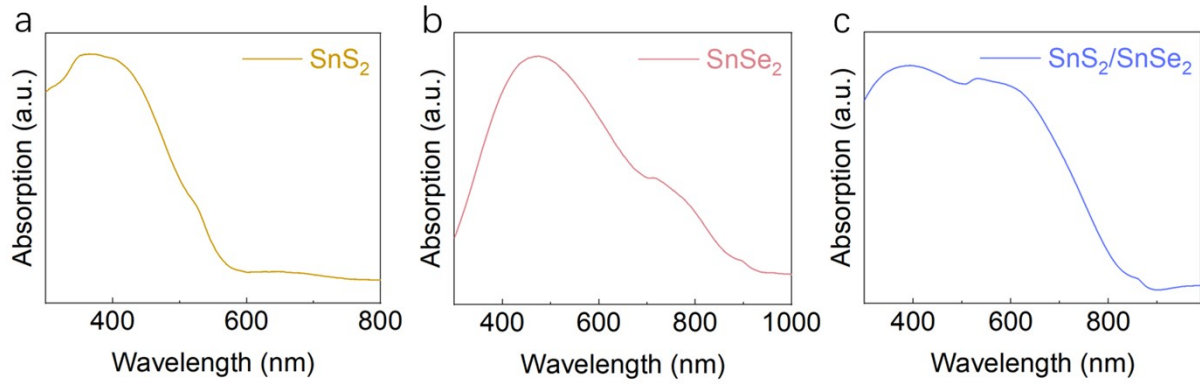

Figure S5 Absorption spectra of (a) SnS<sub>2</sub>, (b) SnSe<sub>2</sub> and (c) SnS<sub>2</sub>/SnSe<sub>2</sub> heterostructure.

By analyzing the absorption spectra (as illustrated in Figure S5), SnS<sub>2</sub> exhibits a broad absorption peak spanning from 350 nm to 500 nm, indicating that its remarkable optical absorption characteristics across the ultraviolet-visible spectrum. SnSe<sub>2</sub> has the light absorption peak in the range of ultraviolet-visible spectrum, featuring a pronounced absorption peak at wavelengths between 400 nm and 700 nm. A noticeable expansion in the range of light absorption is found in the SnSe<sub>2</sub>/SnS<sub>2</sub> heterostructure, with heightened absorption intensity particularly in the visible region, which signifies the potential of the SnSe<sub>2</sub>/SnS<sub>2</sub> heterostructure in the realm of optoelectronic devices.

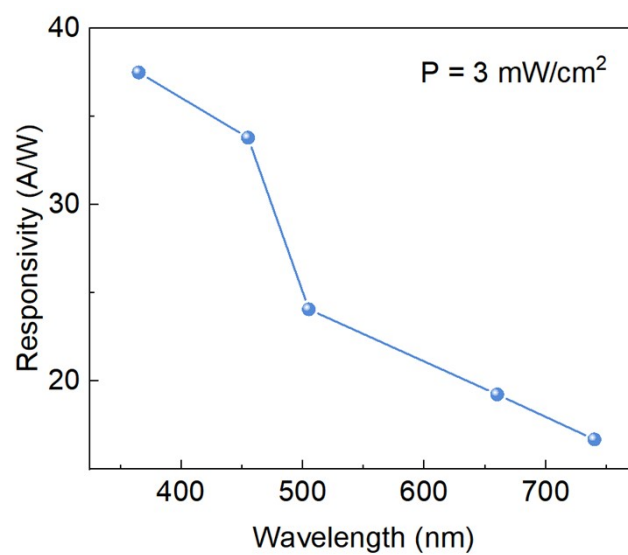

Figure S6 Responsivity as a function of wavelengths for the SnSe<sub>2</sub>/SnS<sub>2</sub>/h-BN/graphene heterostructure.

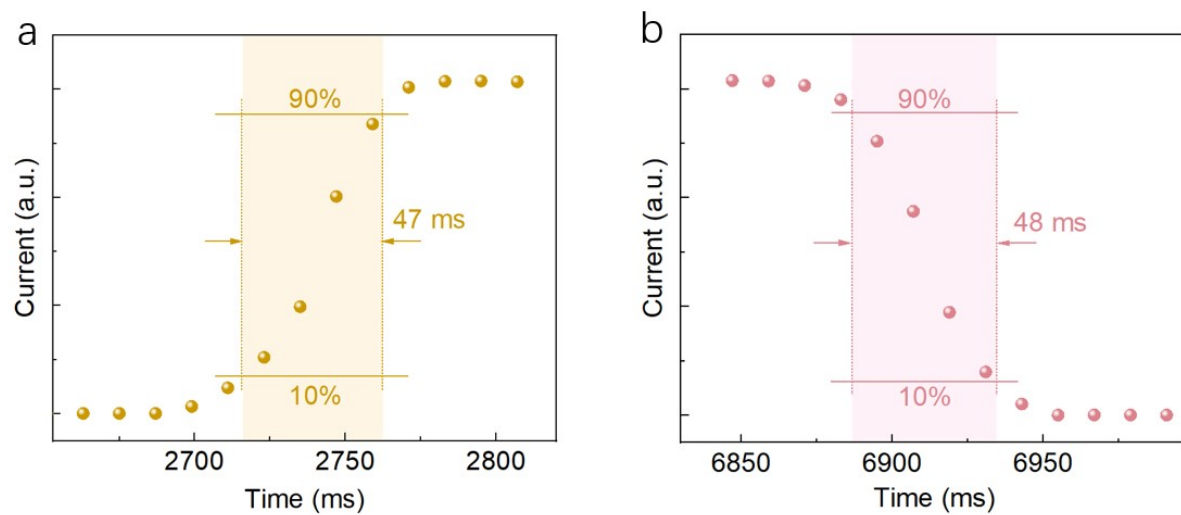

Figure S7 The rise (a) and decay time (b) of the SnSe<sub>2</sub>/SnS<sub>2</sub> heterostructure.



Table S1 Comparison the parameters of various type I-III vdW heterostructures photodetectors.

| Materials                               | Type | Wavelength (nm) | R (A/W) | On/off ratio     | D* (Jones)            | $\tau_r$ (ms)   | $\tau_d$ (ms)   | Reference |
|-----------------------------------------|------|-----------------|---------|------------------|-----------------------|-----------------|-----------------|-----------|
| WS <sub>2</sub> /h-BN/PdSe <sub>2</sub> | -    | 520             | -       | 10 <sup>6</sup>  | 2.7x10 <sup>12</sup>  | -               | -               | 1         |
| GaTe/InSe                               | II   | 1064            | 267.4   | -                | 10 <sup>14</sup>      | 10 <sup>3</sup> | 10 <sup>3</sup> | 2         |
| BiI <sub>3</sub> /BiI                   | II   | 638             | 1       | >10 <sup>3</sup> | 8.8x10 <sup>12</sup>  | 0.00382         | 0.00467         | 3         |
| SnS <sub>2</sub> /MoS <sub>2</sub>      | II   | 532             | 28      | 10 <sup>6</sup>  | 4x10 <sup>11</sup>    | 640             | 410             | 4         |
| MoTe <sub>2</sub> /SnSe <sub>2</sub>    | III  | 885             | 36      | 10 <sup>5</sup>  | 1.03x10 <sup>12</sup> | 10              | 12              | 5         |
| PdSe <sub>2</sub> /MoS <sub>2</sub>     | II   | 532             | 9       | -                | 3x10 <sup>10</sup>    | 125             | 7               | 6         |
| WS <sub>2</sub> /PtS <sub>2</sub>       | I    | 653             | 0.33    | >10 <sup>5</sup> | 4.3x10 <sup>10</sup>  | 55              | 54              | 7         |
| GeSe/MoS <sub>2</sub>                   | II   | 532             | 0.105   | 10 <sup>4</sup>  | 1.46x10 <sup>10</sup> | 110             | 750             | 8         |
| InSe/ReS <sub>2</sub>                   | -    | 365             | 1921    | -                | 6.51x10 <sup>13</sup> | 21.6            | 43.2            | 9         |
| WSe <sub>2</sub> /MoS <sub>2</sub>      | II   | 532             | 2700    | 10 <sup>2</sup>  | 5x10 <sup>11</sup>    | 17              | 29              | 10        |
| InSe/PdSe <sub>2</sub>                  | II   | 1650            | 58.8    | -                | 1x10 <sup>10</sup>    | 160             | 180             | 11        |
| WSe <sub>2</sub> /ReS <sub>2</sub>      | II   | 532             | 3       | -                | 8.39x10 <sup>10</sup> | 0.005           | 0.005           | 12        |
| SnSe <sub>2</sub> /SnS <sub>2</sub>     | I    | 365             | 37.5    | 10 <sup>7</sup>  | 1.2x10 <sup>10</sup>  | 47              | 48              | This work |

## References

- 1 Y. Chen, Y. Wang, Z. Wang, Y. Gu, Y. Ye, X. Chai, J. Ye, Y. Chen, R. Xie, Y. Zhou, Z. Hu, Q. Li, L. Zhang, F. Wang, P. Wang, J. Miao, J. Wang, X. Chen, W. Lu, P. Zhou and W. Hu, *Nat Electron*, 2021, **4**, 357–363.
- 2 T. Qi, Y. Gong, A. Li, X. Ma, P. Wang, R. Huang, C. Liu, R. Sakidja, J. Z. Wu, R. Chen and L. Zhang, *Adv Funct Materials*, 2020, **30**, 1905687.
- 3 H. Mu, R. Zhuang, N. Cui, S. Cai, W. Yu, J. Yuan, J. Zhang, H. Liu, L. Mei, X. He, Z. Mei, G. Zhang, Q. Bao and S. Lin, *ACS Nano*, 2023, **17**, 21317–21327.
- 4 S. Quan, L. Li, S. Guo, X. Zhao, D. Weller, X. Wang, S. Fu, R. Liu and Y. Hao, *ACS Appl. Mater. Interfaces*, 2023, **15**, 59592–59599.
- 5 X. Cong, Y. Zheng, F. Huang, Q. You, J. Tang, F. Fang, K. Jiang, C. Han and Y. Shi, *Nano Res.*, 2022, **15**, 8442–8450.
- 6 H. Wang, Z. Li, D. Li, X. Xu, P. Chen, L. Pi, X. Zhou and T. Zhai, *Adv Funct Materials*, 2021, **31**, 2106105.
- 7 Z. Wang, H. Zhang, W. Wang, C. Tan, J. Chen, S. Yin, H. Zhang, A. Zhu, G. Li, Y. Du, S. Wang, F. Liu and L. Li, *ACS Appl. Mater. Interfaces*, 2022, **14**, 37926–37936.
- 8 Y. Xin, X. Wang, Z. Chen, D. Weller, Y. Wang, L. Shi, X. Ma, C. Ding, W. Li, S. Guo and R. Liu, *ACS Appl. Mater. Interfaces*, 2020, **12**, 15406–15413.
- 9 H. Ma, Y. Xing, J. Han, B. Cui, T. Lei, H. Tu, B. Guan, Z. Zeng, B. Zhang and W. Lv, *Advanced Optical Materials*, 2022, **10**, 2101772.
- 10 G. H. Shin, C. Park, K. J. Lee, H. J. Jin and S.-Y. Choi, *Nano Lett.*, 2020, **20**, 5741–5748.
- 11 W. Ahmad, J. Liu, J. Jiang, Q. Hao, D. Wu, Y. Ke, H. Gan, V. Laxmi, Z. Ouyang, F. Ouyang, Z. Wang, F. Liu, D. Qi and W. Zhang, *Adv Funct Materials*, 2021, **31**, 2104143.

12 A. Varghese, D. Saha, K. Thakar, V. Jindal, S. Ghosh, N. V. Medhekar, S. Ghosh and S. Lodha, *Nano Lett.*, 2020, **20**, 1707–1717.
